# Supplementary material for: Contracting for Collaborative Services
Source: Atypon-hosted journal article supplement (doi:10.1287/mnsc.1100.1146), 2010-03-16
Supplement: mnsc.1100.1146-sm-ec.pdf [file mnsc.1100.1146-sm-ec.pdf]

**e - c o m p a n i o n**

ONLY AVAILABLE IN ELECTRONIC FORM

Electronic Companion—“Contracting for Collaborative Services”  
by Guillaume Roels, Uday S. Karmarkar, and Scott Carr,  
*Management Science*, DOI 10.1287/mnsc.1100.1146.

---

## Proofs of Statements

### EC.1. Proof of Proposition 1

1. The derivative of  $x^{FB}(\alpha)$  with respect to  $\alpha$  equals

$$\frac{dx^{FB}(\alpha)}{d\alpha} = \frac{x^{FB}(\alpha)}{1 - \alpha - \beta} \left( \ln(x^{FB}(\alpha)) + \frac{1 - \beta}{\alpha} \right).$$

Hence, for any  $\alpha$ ,  $dx^{FB}(\alpha)/d\alpha \geq 0$  if and only if  $\ln(x^{FB}(\alpha)) + (1 - \beta)/\alpha \geq 0$ . When  $dx^{FB}(\bar{\alpha})/d\alpha = 0$ , the derivative of this function with respect to  $\alpha$  equals  $(dx^{FB}(\bar{\alpha})/d\alpha)/(x^{FB}(\bar{\alpha})) - (1 - \beta)/\bar{\alpha}^2 = -(1 - \beta)/\bar{\alpha}^2 \leq 0$ . Accordingly, the function  $\ln(x^{FB}(\alpha)) + (1 - \beta)/\alpha$  is decreasing in the neighborhood of  $\bar{\alpha}$ , showing that  $x^{FB}(\bar{\alpha})$  is a local maximum. Furthermore,  $dx^{FB}(0)/d\alpha \geq 0$ . Hence,  $x^{FB}(\alpha)$  is either increasing-decreasing or always increasing.

Whenever  $x^{FB}(\alpha) \geq e^{-1}$ , we have  $\ln(x^{FB}(\alpha)) \geq -1$  and therefore  $dx^{FB}(\alpha)/d\alpha \geq (x^{FB}(\alpha))/(1 - \alpha - \beta) (-1 + (1 - \beta)/\alpha) > 0$ , where the second equality follows from the fact that  $\alpha < 1 - \beta$ . Hence  $x^{FB}(\alpha)$  is increasing whenever  $x^{FB}(\alpha) \geq e^{-1}$ .

2. The derivative of  $y^{FB}(\alpha)$  with respect to  $\alpha$  equals

$$\frac{dy^{FB}(\alpha)}{d\alpha} = \frac{y^{FB}(\alpha)}{1 - \alpha - \beta} (\ln(x^{FB}(\alpha)) + 1).$$

Hence, for any  $\alpha$ ,  $dy^{FB}(\alpha)/d\alpha \leq 0$  if and only if  $\ln(x^{FB}(\alpha)) + 1 \leq 0$ . From the first part of the proof, we know that  $x^{FB}(\alpha)$  is either always increasing or increasing-decreasing. If  $dx^{FB}(\alpha)/\alpha \geq 0$  for all  $\alpha$ , the function  $\ln(x^{FB}(\alpha)) + 1$  crosses zero at most once, and if it does, say at  $\bar{\alpha}$ , it crosses it from below. Hence, if  $\ln(x^{FB}(\bar{\alpha})) + 1 = 0$ ,  $y^{FB}(\bar{\alpha})$  is a local minimum.

Suppose now that  $x^{FB}(\alpha)$  is first increasing and then decreasing with  $\alpha$ . For this to be true, we must have  $x^{FB}(\alpha) \leq e^{-1}$  for all  $\alpha$ . Otherwise, from the first part of the proof,  $x^{FB}(\alpha)$  would always be increasing. Whenever  $x^{FB}(\alpha) \leq e^{-1}$ , we have  $\ln(x^{FB}(\alpha)) \leq -1$  and therefore  $dy^{FB}(\alpha)/d\alpha \geq (y^{FB}(\alpha))/(1 - \alpha - \beta) (-1 + 1) = 0$ . Hence  $y^{FB}(\alpha)$  is decreasing whenever  $x^{FB}(\alpha) \leq e^{-1}$  and therefore when  $x^{FB}(\alpha)$  is increasing-decreasing with  $\alpha$ .

3. The derivative of  $\Pi^{FB}(\alpha, \beta)$  with respect to  $\alpha$  equals

$$\frac{\partial \Pi^{FB}(\alpha, \beta)}{\partial \alpha} = \frac{\Pi^{FB}(\alpha, \beta)}{1 - \alpha - \beta} \ln(x^{FB}(\alpha, \beta)).$$

Hence, for any  $\alpha$ ,  $\partial\Pi^{FB}(\alpha, \beta)/\partial\alpha \geq 0$  if and only if  $\ln(x^{FB}(\alpha, \beta)) \geq 0$ . The monotone relationship of  $\Pi^{FB}(\alpha, \beta)$  on  $\beta$  is proved in a similar way. Finally,  $\Pi^{FB}(\alpha, \beta)$  is jointly convex because the convexity of the output function  $\mu x^\alpha y^\beta$  with respect  $(\alpha, \beta)$  is preserved under maximization (Boyd and Vandenberghe 2004, p. 80).  $\square$

## EC.2. Proof of Proposition 2

For any FF-O contract,  $(x^{FF-O}, y^{FF-O})$  is the unique Nash equilibrium of the subgame; hence the incentive-compatibility constraints are satisfied. Moreover, in equilibrium,  $t(x^{FF-O}, V(x^{FF-O}, y^{FF-O})) = c_V y^{FF-O} + U$ , and the vendor's participation constraint is satisfied. The contract is optimal when  $(x^{FF-O}, y^{FF-O})$  maximize  $V(x, y) - (c_B + \phi_{B1})x - c_V y - \phi_{B0}$  because the total surplus is then equal to the first-best profit, discounted by the buyer's verification costs.  $\square$

## EC.3. Proof of Proposition 3

For any FF-E contract,  $(x^{FF-E}, y^{FF-E})$  is the unique Nash equilibrium of the subgame; hence the incentive-compatibility constraints are satisfied. Moreover, in equilibrium, the vendor receives  $U + c_V y^{FF-E} + \phi_{V0}$  when exerting an effort level  $y^{FF-E}$ , and its participation constraint is therefore tight. The contract is optimal because  $(x^{FF-E}, y^{FF-E})$  maximize the first-best total surplus, discounted by the vendor's verification costs.  $\square$

## EC.4. Proof of Proposition 5

1. Follows from 2.
2. We only prove the first case; the second case is treated in a similar way. First, observe that

$$(\alpha + \beta - 2\alpha\beta)^2 - 4\alpha\beta(1 - \alpha)(1 - \beta) = (\alpha - \beta)^2 \geq 0, \quad (\text{EC.1})$$

which leads to the following inequality

$$2\sqrt{\alpha\beta(1 - \alpha)(1 - \beta)} \leq \alpha + \beta - 2\alpha\beta. \quad (\text{EC.2})$$

The first derivative of  $b(\alpha)$  with respect to  $\alpha$  is equal to

$$b'(\alpha) = \frac{\beta(1 - \beta)}{2\sqrt{\alpha\beta(1 - \alpha)(1 - \beta)}(\alpha - \beta)^2} \left( 2\sqrt{\alpha\beta(1 - \alpha)(1 - \beta)} - (\alpha + \beta - 2\alpha\beta) \right) \leq 0$$

where the inequality follows from (EC.2).

The second-derivative of  $b(\alpha)$  is equal to

$$b''(\alpha) = \frac{-\beta(1-\beta) \left( 4\alpha(1-\alpha) \left( 2\sqrt{\alpha\beta(1-\alpha)(1-\beta)} - (\alpha + \beta - 2\alpha\beta) \right) + (\alpha - \beta)^2 \right)}{4\alpha(1-\alpha)\sqrt{\alpha\beta(1-\alpha)(1-\beta)}(\alpha - \beta)^3}.$$

Hence, in order to show that  $b''(\alpha) \geq 0$  for  $\alpha \leq \bar{\alpha}$ , it suffices to show that  $4\alpha(1-\alpha) \left( 2\sqrt{\alpha\beta(1-\alpha)(1-\beta)} - (\alpha + \beta - 2\alpha\beta) \right) + (\alpha - \beta)^2 \geq 0$  if and only if  $\alpha \leq \beta$ , as long as  $\alpha \leq \bar{\alpha}$ . Using (EC.1), this condition can be rewritten as  $-4\alpha(1-\alpha)(\alpha - \beta)^2 / \left( 2\sqrt{\alpha\beta(1-\alpha)(1-\beta)} + (\alpha + \beta - 2\alpha\beta) \right) + (\alpha - \beta)^2 \geq 0$ , or equivalently, as follows:

$$F(\alpha) \doteq (\beta - \alpha)(1 - 2\alpha) + 2\alpha(1 - \alpha) \left( \sqrt{\frac{\beta(1-\beta)}{\alpha(1-\alpha)}} - 1 \right) \geq 0$$

if and only if  $\alpha \leq \beta$ , as long as  $\alpha \leq \bar{\alpha}$ .

When  $\alpha < \beta$ ,  $\alpha \leq 1/2$  because  $\alpha + \beta < 1$ ; therefore,  $(\beta - \alpha)(1 - 2\alpha) \geq 0$ ; moreover, because  $\beta < 1 - \alpha$  and  $\beta > \alpha$ ,  $\beta(1 - \beta) > \alpha(1 - \alpha)$ ; as a result  $F(\alpha) > 0$  when  $\alpha < \beta$ .

If  $\beta \geq 1 - \beta$ ,  $F(\alpha) > 0$  for all  $\alpha \in [0, 1 - \beta)$ , i.e.,  $b''(\alpha) \geq 0$  for all  $\alpha \in [0, 1 - \beta)$ . Suppose now that  $\beta \leq 1/2$ . It turns out that  $F(\alpha)$  has two roots. One of them is  $\beta$  and let us denote by  $\bar{\alpha}$  the second root. Because  $F(\alpha) > 0$  for  $\alpha < \beta$  and  $F(\alpha) = (1 - 2\beta)^2 \geq 0$  when  $\alpha = 1 - \beta$ , the second root  $\bar{\alpha}$  lies somewhere in  $(\beta, 1 - \beta]$ . In addition, because, for any  $\alpha \in (\beta, 1/2]$ ,  $(\beta - \alpha)(1 - 2\alpha) \leq 0$  and  $\beta(1 - \beta) < \alpha(1 - \alpha)$ , and therefore  $F(\alpha) < 0$ , the second root  $\bar{\alpha}$  is greater than  $1/2$ . As a result, if  $\beta \leq 1/2$ , there exists some  $\bar{\alpha} \in (\max\{1/2, \beta\}, 1 - \beta]$  such that  $F(\alpha) \geq 0$  for  $\alpha \leq \beta$ ,  $F(\alpha) \leq 0$  for  $\alpha \in [\beta, \bar{\alpha}]$ , and  $F(\alpha) \geq 0$  for  $\alpha \geq \bar{\alpha}$ , or alternatively, such that  $b''(\alpha) \geq 0$  for all  $\alpha \leq \bar{\alpha}$  and  $b''(\alpha) \leq 0$  for all  $\alpha \geq \bar{\alpha}$ .

3. One can show that, when the bonus rate is set to  $b$ , the total surplus is equal to

$$\Pi(b) = \mu^{\frac{1}{1-\alpha-\beta}} \left( \frac{\alpha(1-b)}{c_B} \right)^{\frac{\alpha}{1-\alpha-\beta}} \left( \frac{\beta b}{c_V} \right)^{\frac{\beta}{1-\alpha-\beta}} (1 - \alpha(1-b) - \beta b).$$

The elasticity of  $\Pi(b)$  is equal to

$$\frac{b\Pi'(b)}{\Pi(b)} = \frac{(1-b)^2\beta(1-\alpha) - b^2\alpha(1-\beta)}{(1-\alpha-\beta)(1-\alpha(1-b) - \beta b)(1-b)},$$

which is equal to  $(\beta - \alpha)/((1 - \alpha - \beta)(2 - \alpha - \beta))$  when  $b = 1/2$ . One can easily show that this elasticity is larger than or equal to -1 whenever  $\alpha \leq 2 - \beta - \sqrt{2(1 - \beta)}$ , which is always true when  $\alpha \leq 1/2$ . Similarly, one can show that the elasticity is smaller than or equal to 1 whenever  $\beta \leq 1/2$ .  $\square$

### EC.5. Proof of Proposition 6

When  $V(x, y) = \mu x^\alpha y^\beta$ , one can show that the total surpluses are equal to:

$$\Pi^{FF-O} = \mu^{\frac{1}{1-\alpha-\beta}} \left( \frac{\alpha}{c_B + \phi_{B1}} \right)^{\frac{1}{1-\alpha-\beta}} \left( \frac{\beta}{c_V} \right)^{\frac{\beta}{1-\alpha-\beta}} (1 - \alpha - \beta) - \phi_{B0} \quad (\text{EC.3})$$

$$\Pi^{FF-E/TM} = \mu^{\frac{1}{1-\alpha-\beta}} \left( \frac{\alpha}{c_B} \right)^{\frac{1}{1-\alpha-\beta}} \left( \frac{\beta}{c_V + \phi_{V1}} \right)^{\frac{\beta}{1-\alpha-\beta}} (1 - \alpha - \beta) - \phi_{V0} \quad (\text{EC.4})$$

$$\Pi^{PB}(1/2) = \mu^{\frac{1}{1-\alpha-\beta}} \left( \frac{\alpha}{2c_B} \right)^{\frac{1}{1-\alpha-\beta}} \left( \frac{\beta}{2c_V} \right)^{\frac{\beta}{1-\alpha-\beta}} (1 - \alpha/2 - \beta/2). \quad (\text{EC.5})$$

Let  $G^{FF-O}(\alpha, \beta) \doteq (c_B/(c_B + \phi_{B1}))^\alpha$ ,  $G^{TM}(\alpha, \beta) \doteq (c_V/(c_V + \phi_{V1}))^\beta$ , and  $G^{PB}(\alpha, \beta) \doteq (1/2)^{\alpha+\beta} ((1 - \alpha/2 - \beta/2)/(1 - \alpha - \beta))^{1-\alpha-\beta}$ . One can check that the functions  $G^{FF-O}(\alpha, \beta)$  and  $G^{TM}(\alpha, \beta)$  are both jointly convex. The function  $G^{PB}(\alpha, \beta)$  is in contrast jointly concave because the function  $F(x) = (1/2)^x ((1 - x/2)/(1 - x))^{1-x}$  is concave in  $x \in [0, 1]$  and because concavity is preserved under affine compositions (Boyd and Vandenberghe 2004, p. 79).

1. When  $\phi_{B0} = \phi_{V0}$ ,  $\Pi^{FF-O} \geq \Pi^{FF-E/TM}$  if and only if  $G^{FF-O}(\alpha, \beta) \geq G^{TM}(\alpha, \beta)$ , that is, if and only if  $\alpha \leq \beta \ln(c_V/(c_V + \phi_{V1}))/\ln(c_B/(c_B + \phi_{B1}))$ . Hence, in the  $(\alpha, \beta)$  space, the region where FF-O (resp. FF-E/TM) contracts generate more surplus than FF-E/TM (resp. FF-O) contracts is a triangle determined by the lines  $\alpha = 0$  (resp.  $\beta = 0$ ),  $\alpha + \beta = 1$ , and  $\alpha = \beta \ln(c_V/(c_V + \phi_{V1}))/\ln(c_B/(c_B + \phi_{B1}))$ .

2. When  $\phi_{V0} = 0$  and  $b = 1/2$ ,  $\Pi^{PB}(1/2) \geq \Pi^{FF-E/TM}$  if and only if  $G^{PB}(\alpha, \beta) \geq G^{TM}(\alpha, \beta)$ . Suppose that  $(\alpha_1, \beta_1)$  and  $(\alpha_2, \beta_2)$  are such that  $G^{PB}(\alpha_i, \beta_i) \geq G^{TM}(\alpha_i, \beta_i)$ , for  $i = 1, 2$ . For any  $\lambda \in [0, 1]$ , we have

$$\begin{aligned} G^{PB}(\lambda\alpha_1 + (1 - \lambda)\alpha_2, \lambda\beta_1 + (1 - \lambda)\beta_2) &\geq \lambda G^{PB}(\alpha_1, \beta_1) + (1 - \lambda)G^{PB}(\alpha_2, \beta_2) \\ &\geq \lambda G^{TM}(\alpha_1, \beta_1) + (1 - \lambda)G^{TM}(\alpha_2, \beta_2) \end{aligned}$$

$$\geq G^{TM}(\lambda\alpha_1 + (1-\lambda)\alpha_2, \lambda\beta_1 + (1-\lambda)\beta_2),$$

where the first inequality follows by concavity of  $G^{PB}(\alpha, \beta)$ , the second by assumption on  $(\alpha_1, \beta_1)$  and  $(\alpha_2, \beta_2)$ , and the third by convexity of  $G^{TM}(\alpha, \beta)$ . Hence, the region  $\{(\alpha, \beta) : \Pi^{PB}(1/2) \geq \Pi^{FF-E/TM}\}$  is convex when  $\phi_{V0} = 0$ .

Similar, when  $\phi_{B0} = 0$ ,  $\Pi^{PB} \geq \Pi^{FF-O}$  if and only if  $G^{PB}(\alpha, \beta) \geq G^{FF-O}(\alpha, \beta)$  and one can show that the region  $\{(\alpha, \beta) : \Pi^{PB}(\alpha, \beta) \geq \Pi^{FF-O}(\alpha, \beta)\}$  is convex when  $\phi_{B0} = 0$ . Because the intersection of two convex regions is convex (Boyd and Vandenberghe 2004, p. 36),  $\mathcal{R}^{PB}$  is convex. One can finally check that, when  $\alpha = \beta = 0$ ,  $G^{PB}(\alpha, \beta) = G^{FF-O}(\alpha, \beta) = G^{TM}(\alpha, \beta) = 1$ ; therefore,  $\mathcal{R}^{PB}$  is anchored at the point  $(\alpha, \beta) = (0, 0)$  when  $\phi_{B0} = \phi_{V0} = 0$ , and therefore when  $\phi_{B0} \geq 0$  and  $\phi_{V0} \geq 0$  given that  $\Pi^{FF-O}$  and  $\Pi^{FF-E/TM}$  are decreasing with  $\phi_{B0}$  and  $\phi_{V0}$ .

3. Similar to Proposition 1, one can show that  $\Pi^{FF-O}$ ,  $\Pi^{TM}$  and  $\Pi^{PB}(b)$  are all convex with respect to  $\alpha$  and  $\beta$ , and so is therefore the function  $\max\{\Pi^{FF-O}, \Pi^{TM}, \max_b \Pi^{PB}(b)\}$  given that convexity is preserved under pointwise maximization (Boyd and Vandenberghe 2004, p. 80). Hence, the function  $\max\{\Pi^{FF-O}, \Pi^{TM}, \max_b \Pi^{PB}(b)\}$  has convex sublevel sets.  $\square$

## EC.6. Proof of Proposition 7

Similar to (2), the expected first-best surplus under output uncertainty is maximized when the effort levels are chosen ex-post and is equal to

$$\mathbb{E}[\Pi^{FB}(\epsilon_0, \epsilon_1)] = \mathbb{E} \left[ \epsilon_1^{\frac{1}{1-\alpha-\beta}} \right] \left( \frac{\alpha}{c_B} \right)^{\frac{\alpha}{1-\alpha-\beta}} \left( \frac{\beta}{c_V} \right)^{\frac{\beta}{1-\alpha-\beta}} (1-\alpha-\beta)$$

and therefore  $\mathbb{E}[\Pi^{FB}(\epsilon_0, \epsilon_1)]/\Pi^{FB} = \mathbb{E} \left[ \epsilon_1^{\frac{1}{1-\alpha-\beta}} \right] / \mu^{\frac{1}{1-\alpha-\beta}}$ .

Under a PB contract, the buyer solves the following program:

$$\begin{aligned} \max_{b,s} \quad & \mathbb{E} \left[ (1-b)\epsilon_0 + (1-b)\epsilon_1 (x(\epsilon_0, \epsilon_1))^\alpha (y(\epsilon_0, \epsilon_1))^\beta - c_B x(\epsilon_0, \epsilon_1) - s \right] \\ & \mathbb{E} \left[ b\epsilon_0 + b\epsilon_1 (x(\epsilon_0, \epsilon_1))^\alpha (y(\epsilon_0, \epsilon_1))^\beta - c_V y(\epsilon_0, \epsilon_1) + s \right] \geq U \quad (IR_V) \\ x(\epsilon_0, \epsilon_1) = \arg \max_{\bar{x}} \quad & \left\{ (1-b)\epsilon_0 + (1-b)\epsilon_1 \bar{x}^\alpha (y(\epsilon_0, \epsilon_1))^\beta - c_B \bar{x} - s \right\} \quad (IC_B) \quad (EC.6) \\ y(\epsilon_0, \epsilon_1) = \arg \max_{\bar{y}} \quad & \left\{ b\epsilon_0 + b\epsilon_1 (x(\epsilon_0, \epsilon_1))^\alpha \bar{y}^\beta - c_V \bar{y} + s \right\} \quad (IC_V). \end{aligned}$$

After solving this program, we obtain from (EC.5) that  $\mathbb{E}[\Pi^{PB}(\epsilon_0, \epsilon_1)] = \Pi^{PB} \mathbb{E} \left[ \epsilon_1^{\frac{1}{1-\alpha-\beta}} \right] / \mu^{\frac{1}{1-\alpha-\beta}}$ .

Under a TM contract, the vendor cedes its decision rights to the buyer. Specifically, the buyer decides how much effort the vendor must exert and pays the vendor a price  $p$  per unit of effort, in addition to a fixed fee  $s$ . That is, the buyer optimizes the following problem:

$$\begin{aligned} \max_{s,p} \quad & \mathbb{E} \left[ \epsilon_0 + \epsilon_1 (x(\epsilon_0, \epsilon_1))^\alpha (y(\epsilon_0, \epsilon_1))^\beta - c_B x(\epsilon_0, \epsilon_1) - p y(\epsilon_0, \epsilon_1) - s \right] \\ \text{s.t.} \quad & \mathbb{E} [s + (p - c_V - \phi_{V1})y(\epsilon_0, \epsilon_1) - \phi_{V0}] \geq U \quad (IR_V) \\ & (x(\epsilon_0, \epsilon_1), y(\epsilon_0, \epsilon_1)) = \arg \max_{\bar{x}, \bar{y}} \{ \epsilon_0 + \epsilon_1 \bar{x}^\alpha \bar{y}^\beta - c_B \bar{x} - p \bar{y} - s \} \quad (IC_B), \end{aligned}$$

which generates the following total surplus:

$$\mathbb{E}[\Pi^{TM}(\epsilon_0, \epsilon_1)] = \mathbb{E} \left[ \epsilon_1^{\frac{1}{1-\alpha-\beta}} \right] \left( \frac{\alpha}{c_B} \right)^{\frac{\alpha}{1-\alpha-\beta}} \left( \frac{\beta}{c_V + \phi_{V1}} \right)^{\frac{\beta}{1-\alpha-\beta}} (1 - \alpha - \beta) - \phi_{V0}.$$

As a result, when  $\phi_{V0} = 0$ , using (EC.4), we find that  $\mathbb{E}[\Pi^{TM}(\epsilon_0, \epsilon_1)] / \Pi^{TM} = \mathbb{E}[\Pi^{FB}(\epsilon_0, \epsilon_1)] / \Pi^{FB}$ .

Under a FF-E contract, the buyer specifies ex-ante the vendor's effort level  $y$ , in exchange for a fixed fee  $s$ , so as to maximize its expected profit, subject to the vendor's participation constraint ( $IR_V$ ) and its ex-post optimal choice of effort ( $IC_B$ ), that is,

$$\begin{aligned} \max_{s,y} \quad & \mathbb{E} [\epsilon_0 + \epsilon_1 (x(\epsilon_0, \epsilon_1))^\alpha y^\beta - c_B x(\epsilon_0, \epsilon_1) - s] \\ \text{s.t.} \quad & s - (c_V + \phi_{V1})y - \phi_{V0} \geq U \quad (IR_V) \\ & x(\epsilon_0, \epsilon_1) = \arg \max_{\bar{x}} \{ \epsilon_0 + \epsilon_1 \bar{x}^\alpha y^\beta - c_B \bar{x} - s \} \quad (IC_B), \end{aligned}$$

which generates an expected total profit equal to

$$\mathbb{E}[\Pi^{FF-E}(\epsilon_0, \epsilon_1)] = \left( \mathbb{E} \left[ \epsilon_1^{\frac{1}{1-\alpha}} \right] \right)^{\frac{1-\alpha}{1-\alpha-\beta}} \left( \frac{\beta}{c_V + \phi_{V1}} \right)^{\frac{\beta}{1-\alpha-\beta}} \left( \frac{\alpha}{c_B} \right)^{\frac{\alpha}{1-\alpha-\beta}} (1 - \alpha - \beta) - \phi_{V0}.$$

As a result, when  $\phi_{V0} = 0$ , using (EC.4),  $\mathbb{E}[\Pi^{FF-E}(\epsilon_0, \epsilon_1)] / \Pi^{FF-E} = \left( \mathbb{E} \left[ \epsilon_1^{\frac{1}{1-\alpha}} \right] \right)^{\frac{1-\alpha}{1-\alpha-\beta}} / \mu^{\frac{1}{1-\alpha-\beta}}$ .

Finally, under a FF-O contract, the buyer specifies ex-ante its effort level  $x$ , a fixed fee  $s$ , as well as an output level  $T$  below which the fixed fee is not transferred. The buyer chooses the contract

parameters so as to maximize its expected profit, subject to the vendor's participation constraint ( $IR_V$ ) and the vendor's ex-post optimal choice of effort ( $IC_V$ ), that is,

$$\begin{aligned} \max_{s,x,y,T} \mathbb{E} \left[ \epsilon_0 + \epsilon_1 x^\alpha (y(\epsilon_0, \epsilon_1))^\beta - (c_B + \phi_{B1})x - \phi_{B0} - s \mathbb{1} \left\{ \epsilon_0 + \epsilon_1 x^\alpha (y(\epsilon_0, \epsilon_1))^\beta \geq T \right\} \right] \\ \text{s.t.} \quad \mathbb{E} \left[ s \mathbb{1} \left\{ \epsilon_0 + \epsilon_1 x^\alpha (y(\epsilon_0, \epsilon_1))^\beta \geq T \right\} - c_V y(\epsilon_0, \epsilon_1) \right] \geq U \quad (IR) \quad (EC.7) \\ y(\epsilon_0, \epsilon_1) = \arg \max_{\bar{y}} s \mathbb{1} \left\{ \epsilon_0 + \epsilon_1 x^\alpha \bar{y}^\beta \geq T \right\} - c_V \bar{y} \quad (IC_V). \end{aligned}$$

The optimal vendor's ex-post level is equal to  $y^{FF-O}(\epsilon_0, \epsilon_1) = \epsilon_1^{-1/\beta} ((T - \epsilon_0)^+)^{1/\beta} x^{-\alpha/\beta}$ , where  $(z)^+ = \max\{0, z\}$ . Because the buyer's profit function is linear decreasing with  $s$ , the optimal fee  $s$  makes the ( $IR_V$ ) constraint tight, giving the buyer an expected profit equal to:

$$\mathbb{E}[T - \epsilon_0]^+ - (c_B + \phi_{B1})x - \phi_{B0} - c_V x^{-\alpha/\beta} (\mathbb{E}[T - \epsilon_0]^+)^{1/\beta} \mathbb{E} \left[ \epsilon_1^{-1/\beta} \right] - U.$$

The buyer's profit function is concave in  $\mathbb{E}[T - \epsilon_0]^+$  and is maximized at  $\mathbb{E}[T - \epsilon_0]^+ = (\beta/c_V)^{1-\beta} x^{1-\alpha} \mathbb{E} \left[ \epsilon_1^{-1/\beta} \right]^{-\beta}$ , yielding the buyer  $\mathbb{E} \left[ \epsilon_1^{-1/\beta} \right]^{-\beta} x^{1-\alpha} (\beta/c_V)^{1-\beta} (1 - \beta) - (c_B + \phi_{B1})x - \phi_{B0} - U$ . The buyer's maximum expected profit is attained when  $x = \mathbb{E} \left[ \epsilon_1^{-1/\beta} \right]^{-\beta} (\alpha/(c_B + \phi_{B1}))^{1-\alpha-\beta} (\beta/c_V)^{\beta/(1-\alpha-\beta)}$ , and is equal to

$$\mathbb{E}[\Pi^{FF-O}(\epsilon_0, \epsilon_1)] = \mathbb{E} \left[ \epsilon_1^{-1/\beta} \right]^{-\beta} \left( \frac{\alpha}{c_B + \phi_{B1}} \right)^{1-\alpha-\beta} \left( \frac{\beta}{c_V} \right)^{\beta/(1-\alpha-\beta)} (1 - \alpha - \beta). \quad (EC.8)$$

As a result, when  $\phi_{B0} = 0$ , using (EC.4),  $\mathbb{E}[\Pi^{FF-O}(\epsilon_0, \epsilon_1)]/\Pi^{FF-O} = \left( \mathbb{E} \left[ \epsilon_1^{-1/\beta} \right] \right)^{-\beta} / \mu^{1-\alpha-\beta}$ .

The end of the proof consists in showing that:

$$\left( \mathbb{E} \left[ \epsilon_1^{-1/\beta} \right] \right)^{-\beta} \leq \left( \mathbb{E} \left[ \epsilon_1^{1-\alpha} \right] \right)^{1-\alpha-\beta} \leq \mathbb{E} \left[ \epsilon_1^{1-\alpha-\beta} \right].$$

By Jensen's inequality,  $\mathbb{E} \left[ \epsilon_1^{-1/\beta} \right] \geq (\mathbb{E}[\epsilon_1])^{-1/\beta}$  and  $\mathbb{E} \left[ \epsilon_1^{1-\alpha} \right] \geq (\mathbb{E}[\epsilon_1])^{1-\alpha}$ , showing that

$$\left( \mathbb{E} \left[ \epsilon_1^{-1/\beta} \right] \right)^{-\beta} \leq (\mathbb{E}[\epsilon_1])^{1-\alpha-\beta} \leq \left( \mathbb{E} \left[ \epsilon_1^{1-\alpha} \right] \right)^{1-\alpha-\beta}. \quad (EC.9)$$

The second inequality is showed by using Hölder's inequality:  $\mathbb{E} \left[ \epsilon_1^{1-\alpha} \right] \leq \left( \mathbb{E} \left[ \epsilon_1^{1-\alpha-\beta} \right] \right)^{\frac{1-\alpha-\beta}{1-\alpha}}$ .  $\square$

## EC.7. Proof of Proposition 8

1. If the vendor's unit cost of effort is equal to  $g(z)c_V$ , the first-best total surplus is equal to  $\Pi^{FB}(x, y, z) = V(x, y) - c_Bx - c_Vyg(z) - c_{PI}z$ , which is strictly concave because  $g''(z) > 0$ . The optimal process improvement effort  $z^{FB}$ , if positive, must solve the first-order optimality condition:  $-c_Vyg'(z) = c_{PI}$ . For each contract, the vendor's profit can be written as follows:

$$\Pi_V^{FF-O}(y, z) = s \mathbb{1} \{V(x, y) \geq V^{FF-O} \text{ and } x \geq x^{FF-O}\} - c_Vyg(z) - c_{PI}z$$

$$\Pi_V^{FF-E}(y, z) = s \mathbb{1} \{y \geq y^{FF-E}\} - c_Vyg(z) - \phi_{V1}y - c_{PI}z - \phi_{V0}$$

$$\Pi_V^{TM}(y, z) = s + (p - c_Vg(z) - \phi_{V1})y - c_{PI}z - \phi_{V0}$$

$$\Pi_V^{PB}(y, z) = s + bV(x, y) - c_Vyg(z) - c_{PI}z.$$

For all contracts, the first-order optimality conditions with respect to  $z$  yields that  $-c_Vyg'(z) = c_{PI}$ , similar to the first-best first-order optimality condition.

2. If the vendor needs to work  $g(z)y$  hours to provide  $y$  units of effort,  $\Pi^{FB}(x, y, z)$ ,  $\Pi_V^{FF-O}(y, z)$ , and  $\Pi_V^{PB}(y, z)$  are the same as in Case 1. Under a FF-E and TM contracts, the vendor's profit is equal to:

$$\Pi_V^{FF-E}(y, z) = s \mathbb{1} \{yg(z) \geq y^{FF-E}\} - (c_V + \phi_{V1})yg(z) - c_{PI}z - \phi_{V0}$$

$$\Pi_V^{TM}(y, z) = s + (p - c_V - \phi_{V1})g(z)y - c_{PI}z - \phi_{V0}.$$

In both cases, the vendor's profit is decreasing with  $z$ . The equilibrium vendor's effort level in process improvement is thus equal to zero.

3. If the service output is equal to  $V(x, y)g(z)$ , the first-best total surplus is equal to  $\Pi^{FB}(x, y, z) = V(x, y)g(z) - c_Bx - c_Vy - c_{PI}z$ , which is concave when  $g''(z) < 0$  and  $V(x, y)$  is super-modular. The optimal process improvement effort  $z^{FB}$ , if positive, must satisfy  $V(x, y)g'(z) = c_{PI}$ , whereas the optimal effort  $y^{FB}$  must satisfy  $dV(x, y)/dyg(z) = c_V$ . Combining these two conditions yields:  $c_{PI}g(z^{FB}) \frac{\partial V(x^{FB}, y^{FB})}{\partial y} = c_Vg'(z^{FB})V(x^{FB}, y^{FB})$ .

With a FF-O contract, the vendor's profit can be written as follows:

$$\Pi_V^{FF-O}(y, z) = s \mathbb{1} \{V(x, y)g(z) \geq V^{FF-O} \text{ and } x \geq x^{FF-O}\} - c_Vy - c_{PI}z,$$

and is maximized when  $V(x, y)g(z) \geq V^{FF-O}$ . Minimizing the vendor's costs  $c_V y + c_{PI} z$  subject to the constraint that  $V(x, y)g(z) \geq V^{FF-O}$  yields the same necessary condition as in the first-best solution.

Under a PB contract, the vendor's profit is equal to

$$\Pi_V^{PB}(y, z) = s + bV(x, y)g(z) - c_V y - c_{PI} z.$$

The optimal process improvement effort  $z^{PB}$ , if positive, must satisfy  $bV(x, y)g'(z) = c_{PI}$ , whereas the optimal effort  $y^{PB}$  must satisfy  $b \frac{\partial V(x, y)}{\partial y} g(z) = c_V$ , which yields:  $c_{PI} g(z^{PB}) \frac{\partial V(x^{PB}, y^{PB})}{\partial y} = c_V g'(z^{PB}) V(x^{PB}, y^{PB})$ .

With a FF-E and TM contracts, the vendor's profits can be written as

$$\Pi_V^{FF-E}(y, z) = s \mathbb{1} \{y \geq y^{FF-E}\} - (c_V + \phi_{V1})y - c_{PI} z - \phi_{V0}$$

$$\Pi_V^{TM}(y, z) = s + (p - c_V - \phi_{V1})y - c_{PI} z - \phi_{V0}$$

and they are decreasing with  $z$ . Hence, the optimal process improvement effort level is in this case equal to zero.  $\square$

## EC.8. Proof of Proposition 9

If  $(x^{FB}, y^{FB})$  maximizes the first-best total surplus with one vendor  $V(x, y) - c_B x - c_V y$ , the triplet  $(x^{FB}, y^{FB}, y^{FB})$  will maximize the first-best total surplus with two vendors  $\bar{V}(x, y_1, y_2) - c_B x - (c_V/2)(y_1 + y_2)$ , because the first-order optimality conditions are identical:

$$\begin{aligned} \frac{\partial \bar{V}(x^{FB}, y^{FB}, y^{FB})}{\partial x} - c_B = 0 &\Leftrightarrow \frac{\partial V(x^{FB}, y^{FB})}{\partial x} - c_B = 0 \\ \frac{\partial \bar{V}(x^{FB}, y^{FB}, y^{FB})}{\partial y_i} - \frac{c_V}{2} = 0 &\Leftrightarrow \frac{\partial V(x^{FB}, g(y^{FB}, y^{FB}))}{\partial y} \frac{\partial g(y^{FB}, y^{FB})}{\partial y_i} - \frac{c_V}{2} = 0, \quad \forall i = 1, 2 \\ &\Leftrightarrow \frac{1}{2} \frac{\partial V(x^{FB}, y^{FB})}{\partial y} - \frac{c_V}{2} = 0. \end{aligned}$$

When the buyer makes its efforts verifiable at a cost  $\phi_{B0} + \phi_{B1}x$  and uses two symmetric FF-O contracts, its profit is equal to

$$\Pi_B^{FF-O}(x, V^{FF-O}, s) = \bar{V}(x, y_1, y_2) - (c_B + \phi_{B1})x - 2s \mathbb{1} \{ \bar{V}(x, y_1, y_2) \geq V^{FF-O} \} - \phi_{B0}$$

where the vendors' effort levels individually maximize  $\Pi_{V_i}^{FF-O}(y_i) = s \mathbb{1} \{ \bar{V}(x, y_1, y_2) \geq V^{FF-O} \} - (c_V/2)y_i$ . The buyer sets the fixed fees  $s$  such that the vendors' participation constraints are tight and therefore collects the total surplus, minus the vendors' reservation utilities. Optimizing the contract parameters, one obtains a total surplus identical to the case where there is only one vendor.

When the vendors make their efforts verifiable at a cost  $\phi_{V_0}/2 + (\phi_{V_1}/2)y_i$ ,  $i = 1, 2$ , and the buyer uses two symmetric FF-E contracts (or TM contracts), the buyer's profit equals

$$\Pi_B^{FF-E}(x, y^{FF-E}, s) = \bar{V}(x, y_1, y_2) - c_B x - s \mathbb{1} \{ y_1 \geq y^{FF-E} \} - s \mathbb{1} \{ y_2 \geq y^{FF-E} \}$$

where the vendors' effort levels maximize  $\Pi_{V_i}^{FF-E}(y_i) = s \mathbb{1} \{ y_i \geq y^{FF-E} \} - (c_V + \phi_{V_1})/2 y_i - \phi_{V_0}/2$ .

The buyer sets the fixed fees  $s$  such that the vendors' participation constraints are tight and therefore collects the total surplus, minus the vendors' reservation utilities. Optimizing the contract parameters, one obtains a total surplus identical to the case where there is only one vendor.

Finally, with double moral hazard, when the buyer uses two symmetric PB contracts giving a share  $b/2$  of the output to each vendor, the buyer's profit is equal to

$$\Pi_B^{PB}(x, b, s) = (1 - b)\bar{V}(x, y_1, y_2) - c_B x - 2s.$$

On the other hand, the vendors' profits are equal to  $\Pi_{V_i}^{PB}(y_i) = (b/2)\bar{V}(x, y_1, y_2) - (c_V/2)y_i + s$  and are maximized when  $y_i$  solves

$$\begin{aligned} \frac{b}{2} \frac{\partial \bar{V}(x, y_1, y_1)}{\partial y_i} - \frac{c_V}{2} = 0 \quad \forall i = 1, 2 &\Leftrightarrow \frac{b}{2} \frac{\partial \bar{V}(x, y_1, y_2)}{\partial y_i} - \frac{c_V}{2} = 0 \quad \forall i = 1, 2 \\ &\Leftrightarrow \frac{b}{2} \frac{\partial V(x, g(y_1, y_1))}{\partial y} \frac{\partial g(y_1, y_1)}{\partial y_i} - \frac{c_V}{2} = 0 \quad \forall i = 1, 2 \\ &\Leftrightarrow \frac{b}{2} \frac{\partial V(x, y)}{\partial y} - c_V = 0 \end{aligned}$$

where the first identity follows from the fact that both vendors are symmetric, the second identity follows by definition of  $\bar{V}$  and the third identity follows from the fact that  $\frac{\partial g(y_1, y_2)}{\partial y_i} = 1/2$  when  $y_1 = y_2$ .

By contrast, with only one vendor, the vendor's profit is equal to  $bV(x, y) - c_V y - s$  and is maximized when  $y$  solves  $b\partial V(x, y)/\partial y - c_V = 0$ . Hence, the equilibrium effort level of each vendor is smaller than if there was only one vendor; in particular, the average effort level  $g(y_1, y_2)$  with two vendors is smaller than if there was only one vendor. By supermodularity of  $\bar{V}(x, y_1, y_2)$ , the buyer will therefore provide less effort with two vendors than with one vendor. Because  $V(x, y) - c_B x - c_V y$  is strictly concave and  $x^{PB} \leq x^{FB}$  and  $y^{PB} \leq y^{FB}$ , the total surplus achieved with two vendors is then strictly smaller than that achieved with one vendor only.  $\square$
